# Supplementary material for: CIRCexplorer3: A CLEAR Pipeline for Direct Comparison of Circular and Linear RNA Expression
Source: PubMed Central journal article supplement — Genomics Proteomics Bioinformatics. 2020 Jan 3;17(5):511–21. doi: 10.1016/j.gpb.2019.11.004 (PMC7056929; doi:10.1016/j.gpb.2019.11.004), 2020-01-03

**A**

| Annotations                                                      | No. of genes | No. of transcripts | No. of circRNAs (FPB $\geq$ 1) |
|------------------------------------------------------------------|--------------|--------------------|--------------------------------|
| NCBI RefSeq (only primary assemblies)<br>redundant RNAs* removed | 24,711       | 53,479             | 6710 (150)                     |
| UCSC refGene + GENCODE                                           | 58,434       | 263,836            | 6891 (155)                     |

\*Redundant RNAs: miscRNA, rRNA, tRNA, scRNA, snRNA, snoRNA, and miRNA

**B**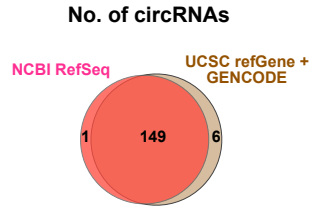

Supplement: mmc1.pdf [file mmc1.pdf]
