# Supplementary material for: CIRCexplorer3: A CLEAR Pipeline for Direct Comparison of Circular and Linear RNA Expression
Source: PubMed Central journal article supplement — Genomics Proteomics Bioinformatics. 2020 Jan 3;17(5):511–21. doi: 10.1016/j.gpb.2019.11.004 (PMC7056929; doi:10.1016/j.gpb.2019.11.004), 2020-01-03
Supplement: mmc2.pdf [file mmc2.pdf]

**A**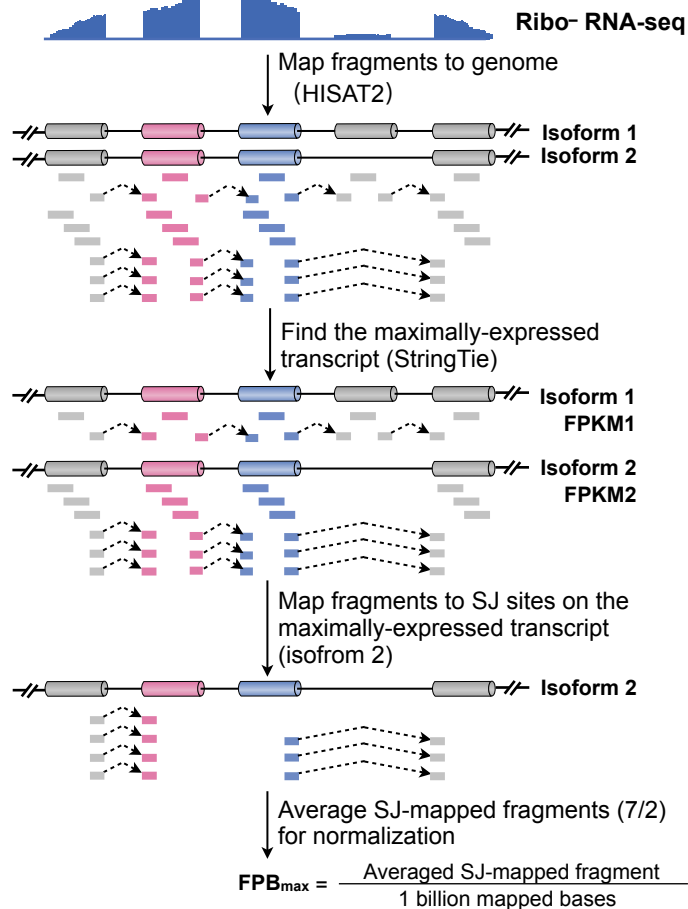**B**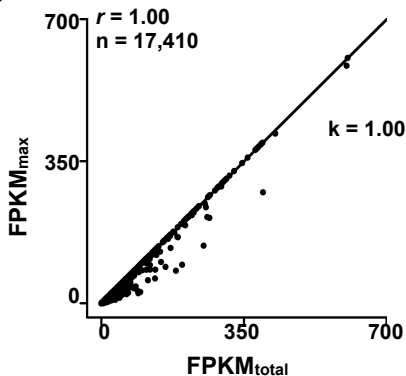

$$FPKM_{\max} = FPKM2$$

$$FPKM_{\text{total}} = FPKM1 + FPKM2 + \dots + FPKMn$$

**C**

1 FPB = 1 fragment per billion-mapped-bases

$$= \frac{1 \text{ fragment (mapped to SJ site)}}{1 \text{ billion mapped bases}}$$

$$= \frac{1 \text{ fragment}}{1000 \text{ bases} \times \text{million}}$$

$$= \frac{1 \text{ fragment}}{1 \text{ kb} \times \text{million}}$$

$$= 1 \text{ FPB}$$
