# Supplementary material for: CIRCexplorer3: A CLEAR Pipeline for Direct Comparison of Circular and Linear RNA Expression
Source: PubMed Central journal article supplement — Genomics Proteomics Bioinformatics. 2020 Jan 3;17(5):511–21. doi: 10.1016/j.gpb.2019.11.004 (PMC7056929; doi:10.1016/j.gpb.2019.11.004), 2020-01-03
Supplement: mmc5.pdf [file mmc5.pdf]

**A**

$$\begin{aligned}
 1 \text{ FPB} &= \frac{1 \text{ fragment (mapped to BSJ site)}}{1 \text{ billion mapped bases}} \\
 &= \frac{1 \text{ fragment}}{10 \times (100 \text{ bases/fragment}^* \times \text{million})} \\
 &= \frac{1 \text{ fragment}}{10 \text{ million-fragments}} \\
 &= 0.1 \text{ FPM}^*
 \end{aligned}$$

\* for 1 × 100 bp single-end RNA-seq

**B**

$$\begin{aligned}
 1 \text{ FPB} &= \frac{1 \text{ fragment (mapped to BSJ site)}}{1 \text{ billion mapped bases}} \\
 &= \frac{1 \text{ fragment}}{5 \times (2 \times 100 \text{ bases/fragment}^{**} \times \text{million})} \\
 &= \frac{1 \text{ fragment}}{5 \text{ million- (paired-end) fragments}} \\
 &= 0.2 \text{ FPM}^{**}
 \end{aligned}$$

\*\* for 2 × 100 bp paired-end RNA-seq
