# Supplementary material for: CIRCexplorer3: A CLEAR Pipeline for Direct Comparison of Circular and Linear RNA Expression
Source: PubMed Central journal article supplement — Genomics Proteomics Bioinformatics. 2020 Jan 3;17(5):511–21. doi: 10.1016/j.gpb.2019.11.004 (PMC7056929; doi:10.1016/j.gpb.2019.11.004), 2020-01-03
Supplement: mmc7.pdf [file mmc7.pdf]

**A**

| Tool                | Sample | Read type  | No. of reads or fragments | Elapsed time (hour) | Memory consumption (GB) |
|---------------------|--------|------------|---------------------------|---------------------|-------------------------|
| CIRCexplorer3-CLEAR | PA1    | single-end | 125,735,340               | 4.0                 | 7.7                     |
|                     | Cortex | paired-end | 114,797,948               | 6.5                 | 7.2                     |
| DCC                 | PA1    | single-end | 125,735,340               | 2.7                 | 33.9                    |
|                     | Cortex | paired-end | 114,797,948               | 31.7                | 34.7                    |

**B**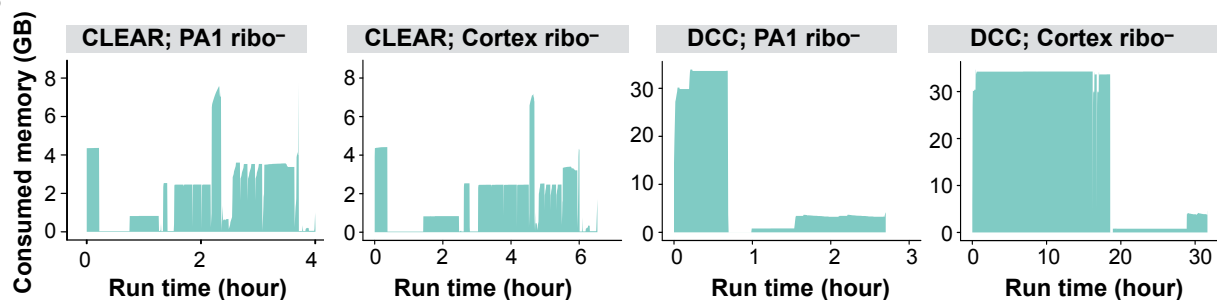**C****CLEAR**

one command:

```
clear_quant -1 PA1.fq -g hg38.fa -i hisat2_index -j bowtie1_index -G gene.gtf -o out_dir -p 10
```

**DCC**

multiple steps:

```
STAR --runThreadN 10\
--genomeDir star_index\
--genomeLoad NoSharedMemory\
--readFilesIn PA1.fq\
--outFileNamePrefix PA1_star\
--outReadsUnmapped Fastx\
--outSAMattributes NH HI AS nM NM MD jM jI XS\
--outSJfilterOverhangMin 15 15 15 15\
--outFilterMultimapNmax 20\
--outFilterScoreMin 1\
--outFilterMatchNminOverLread 0.7\
--outFilterMismatchNmax 999\
--outFilterMismatchNoverLmax 0.05\
--alignIntronMin 20\
--alignIntronMax 1000000\
--alignMatesGapMax 1000000\
--alignSJoverhangMin 15\
--alignSJDBoverhangMin 10\
--alignSoftClipAtReferenceEnds No\
--chimSegmentMin 15\
--chimScoreMin 15\
--chimScoreSeparation 10\
--chimJunctionOverhangMin 15\
--sjdbGTFfile gene.gtf\
--quantMode GeneCounts\
--twopassMode Basic\
--chimOutType Junctions SeparateSAMold
samtools view -bS PA1_starAligned.out.sam > PA1_starAligned.out.bam
samtools sort PA1_starAligned.out.bam > PA1_starAligned.sorted.bam
samtools index PA1_starAligned.sorted.bam
ls | grep bam$ | grep -v mate > bam_files.txt
ls | grep junction$ | grep -v mate > samplesheet
circ_tools detect @samplesheet -T 10 -N -D -an gene.gtf -F -Nr 1 1 -fg -G -A hg38.fa -B @bam_files.txt
```
