# Supplementary figures and images for: CIRCexplorer3: A CLEAR Pipeline for Direct Comparison of Circular and Linear RNA Expression
Source: PubMed Central journal article supplement — Genomics Proteomics Bioinformatics. 2020 Jan 3;17(5):511–21. doi: 10.1016/j.gpb.2019.11.004 (PMC7056929; doi:10.1016/j.gpb.2019.11.004), 2020-01-03

**A** TopHat2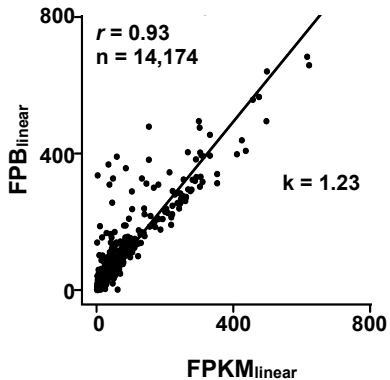**B** MapSplice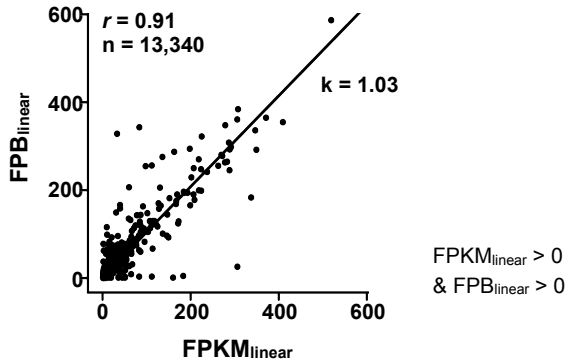

Supplement: mmc3.pdf [file mmc3.pdf]

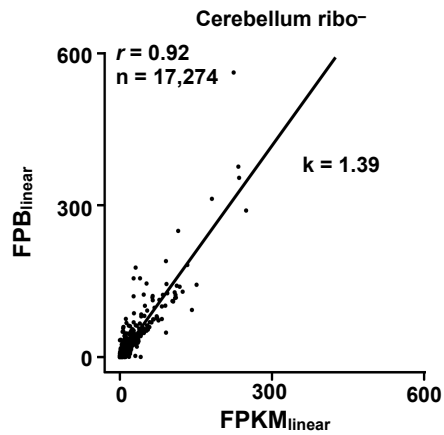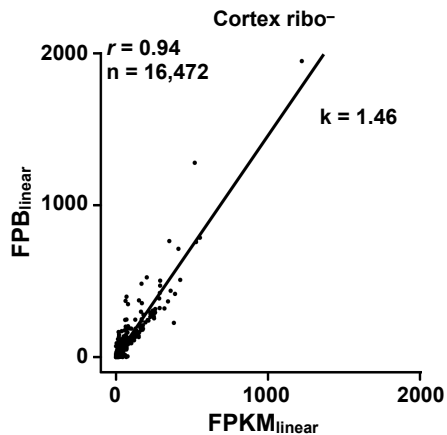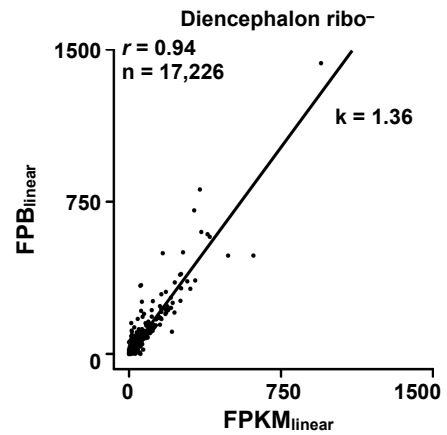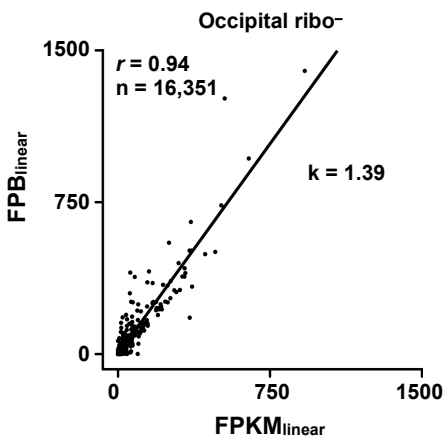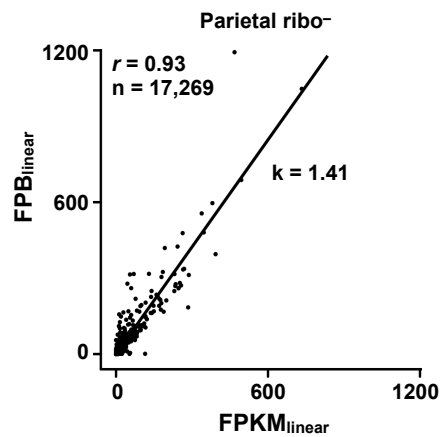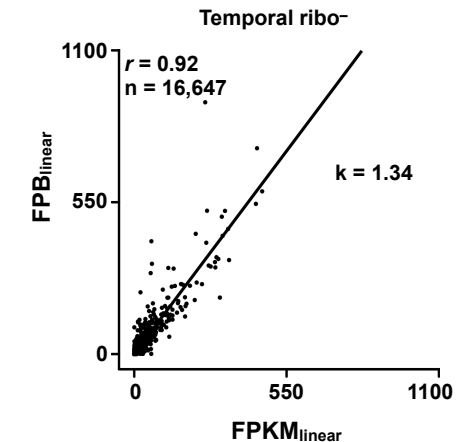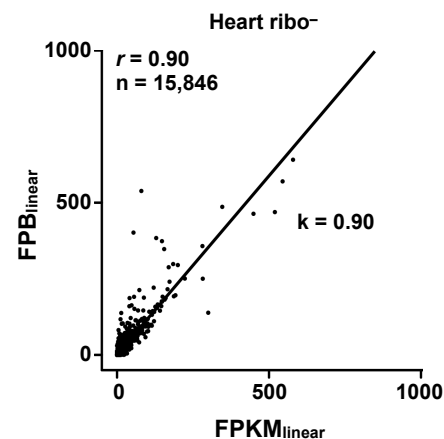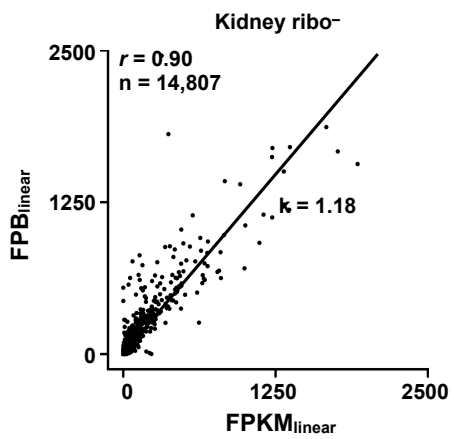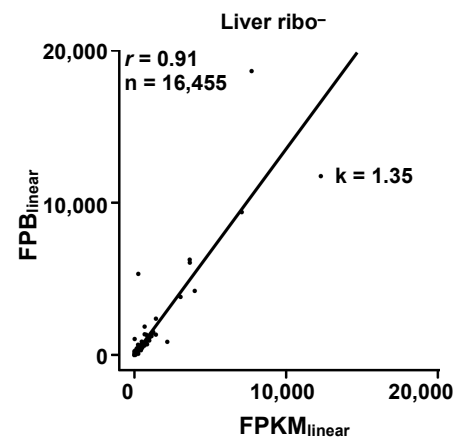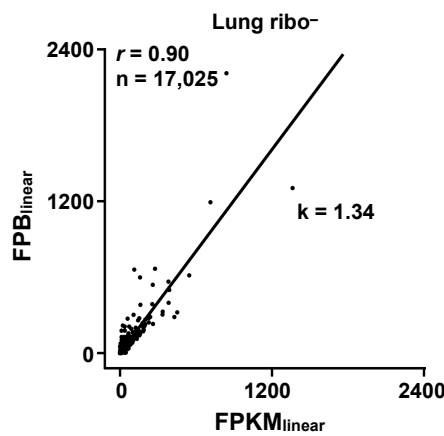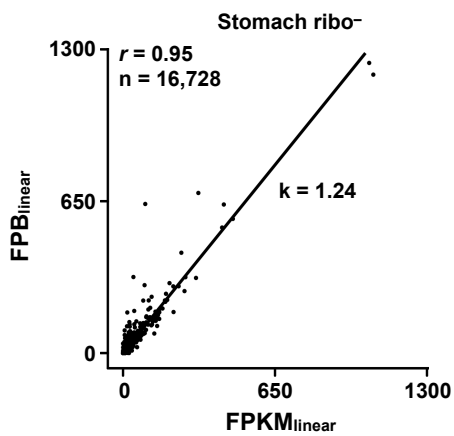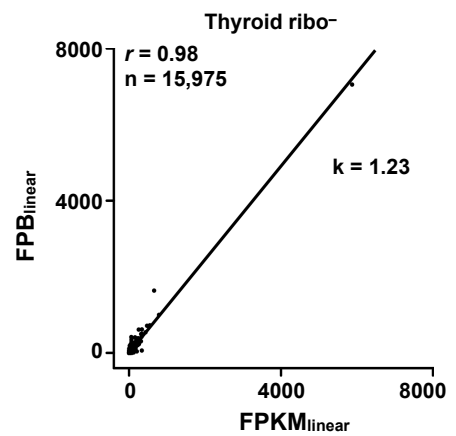

Supplement: mmc4.pdf [file mmc4.pdf]

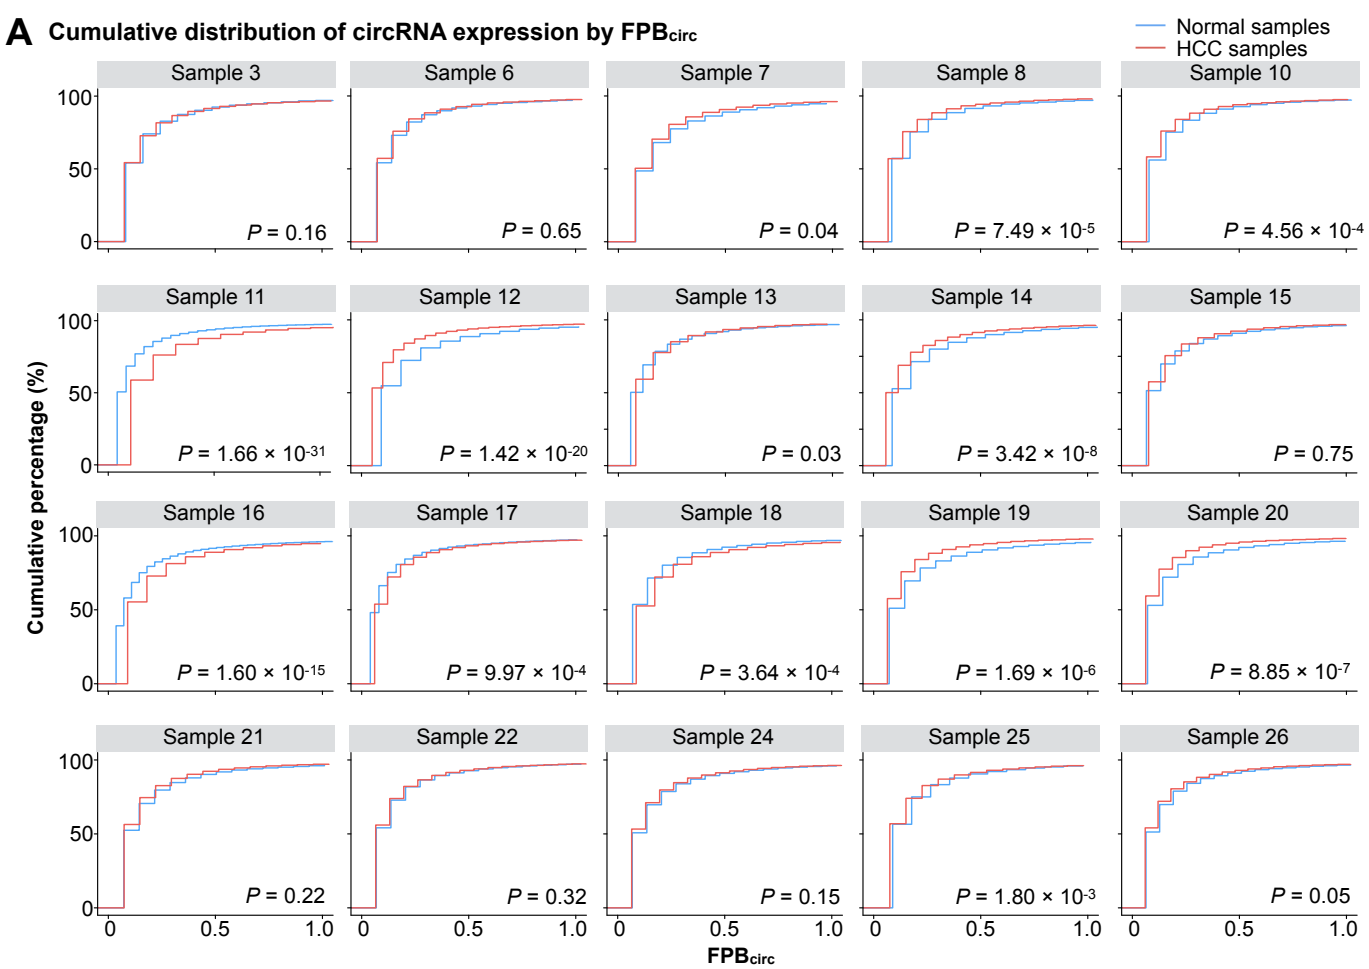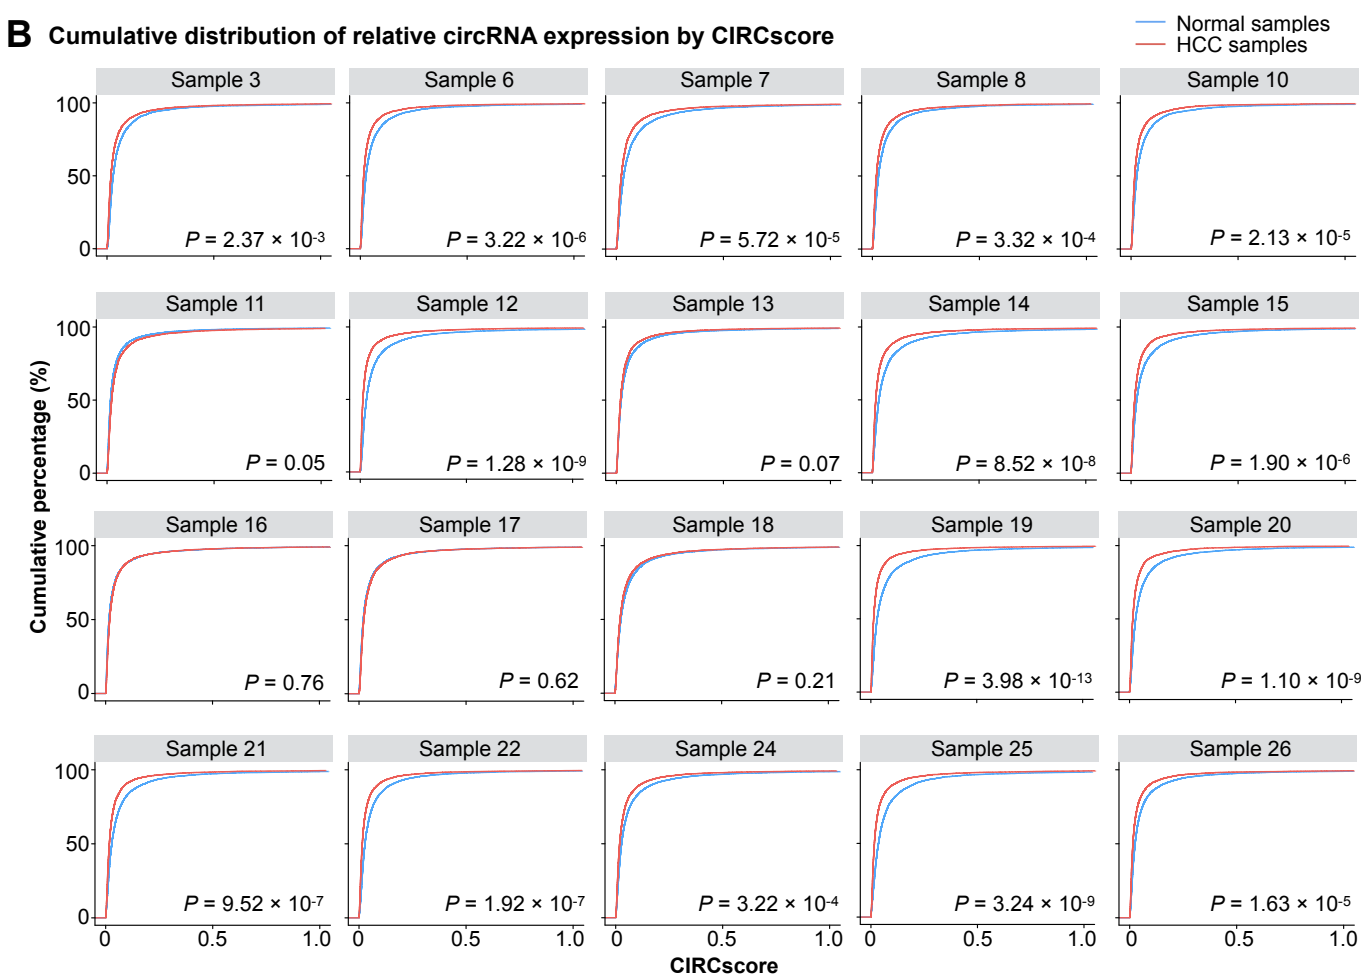

Supplement: mmc6.pdf [file mmc6.pdf]
